# Supplementary material for: Down-regulation of salt-inducible kinase 1 (SIK1) is mediated by RNF2 in hepatocarcinogenesis
Source: PubMed Central journal article supplement (PMC5356871; doi:10.18632/oncotarget.13673), 2016-11-29
Supplement: oncotarget-08-3144-s001.pdf [file oncotarget-08-3144-s001.pdf]

## Down-regulation of salt-inducible kinase 1 (SIK1) is mediated by RNF2 in hepatocarcinogenesis

### SUPPLEMENTARY TABLE

Supplementary Table S1: Correlation Between the Prognostic Factors and Clinicopathologic Characteristics in HCC (Cohort 1, n = 67)

|                                     | RNF2 expression in HCC |      |                 | SIK1 expression in HCC |      |                 |
|-------------------------------------|------------------------|------|-----------------|------------------------|------|-----------------|
|                                     | Low                    | High | p Value         | Low                    | High | p Value         |
| <b>All cases</b>                    | 43                     | 24   |                 | 27                     | 40   |                 |
| <b>Gender</b>                       |                        |      |                 |                        |      |                 |
| Women                               | 21                     | 11   | NS              | 15                     | 25   | NS              |
| Men                                 | 22                     | 13   |                 | 12                     | 15   |                 |
| <b>Age</b>                          |                        |      |                 |                        |      |                 |
| <50                                 | 20                     | 12   | NS              | 13                     | 22   | NS              |
| >50                                 | 23                     | 12   |                 | 14                     | 18   |                 |
| <b>HBV infection</b>                |                        |      |                 |                        |      |                 |
| Negative                            | 25                     | 10   | NS              | 16                     | 25   | NS              |
| Positive                            | 18                     | 14   |                 | 11                     | 15   |                 |
| <b>AFP</b>                          |                        |      |                 |                        |      |                 |
| Negative (<20 ng/ml)                | 28                     | 12   | NS              | 14                     | 20   | NS              |
| Positive (>20 ng/ml)                | 15                     | 12   |                 | 13                     | 20   |                 |
| <b>Cirrhosis</b>                    |                        |      |                 |                        |      |                 |
| Negative                            | 22                     | 13   | NS              | 16                     | 29   | NS              |
| Positive                            | 21                     | 11   |                 | 11                     | 11   |                 |
| <b>HBV history</b>                  |                        |      |                 |                        |      |                 |
| No                                  | 24                     | 15   | NS              | 17                     | 30   | NS              |
| Yes                                 | 19                     | 9    |                 | 10                     | 10   |                 |
| <b>Family history of HCC</b>        |                        |      |                 |                        |      |                 |
| No                                  | 21                     | 12   | NS              | 15                     | 24   | NS              |
| Yes                                 | 22                     | 12   |                 | 12                     | 16   |                 |
| <b>Capsular Invasion</b>            |                        |      |                 |                        |      |                 |
| No                                  | 32                     | 18   | <b>&lt;0.01</b> | 19                     | 28   | <b>&lt;0.01</b> |
| Yes                                 | 11                     | 6    |                 | 8                      | 12   |                 |
| <b>Tumor size</b>                   |                        |      |                 |                        |      |                 |
| <                                   | 38                     | 9    | <b>&lt;0.01</b> | 8                      | 28   | <b>&lt;0.01</b> |
| >                                   | 5                      | 15   |                 | 19                     | 12   |                 |
| <b>Pathological differentiation</b> |                        |      |                 |                        |      |                 |
| I-II                                | 22                     | 13   | NS              | 13                     | 29   | NS              |
| III-IV                              | 21                     | 11   |                 | 14                     | 11   |                 |
| <b>TNM clinical stage</b>           |                        |      |                 |                        |      |                 |
| I-II                                | 19                     | 11   | NS              | 17                     | 25   | NS              |
| III                                 | 24                     | 13   |                 | 10                     | 25   |                 |

Abbreviations: Correlation between SIK1, RNF2 expression and clinicopathological characteristics of 67 patients with HCC Chi-square test was used.

Bold text represents p values with significant difference.

HBV, hepatitis type B virus; AFP,  $\alpha$ -Fetoprotein; HCC, hepatocellular carcinoma.
